# Supplementary material
Source: publisher figshare collection journal article supplement (https://diabetesjournals.figshare.com/articles/dataset/_/20054417)
Supplement: Supplementary file 1 [file 1]

Supplemental Table 4. Key resources

| REAGENT or RESOURCE                                  | SOURCE                    | IDENTIFIER                                                                                                          |
|------------------------------------------------------|---------------------------|---------------------------------------------------------------------------------------------------------------------|
| <b>Antibodies</b>                                    |                           |                                                                                                                     |
| IRF4 Rabbit Polyclonal Antibody                      | Proteintech               | RRID: AB_2264940                                                                                                    |
| Total OXPHOS Rodent WB Antibody Cocktail             | Abcam                     | RRID: AB_2629281                                                                                                    |
| Phospho-mTOR (Ser2448) Antibody                      | Cell Signaling Technology | RRID: AB_330970                                                                                                     |
| Phospho-p70 S6 Kinase (Thr389) (108D2) Rabbit mAb    | Cell Signaling Technology | RRID: AB_2269803                                                                                                    |
| mTOR Antibody                                        | Cell Signaling Technology | RRID: AB_330978                                                                                                     |
| p70 S6 Kinase (49D7) rabbit mAb                      | Cell Signaling Technology | RRID: AB_390722                                                                                                     |
| BCATm Polyclonal Antibody                            | Thermo Fisher Scientific  | RRID:AB_11157217                                                                                                    |
| $\beta$ -Actin Antibody                              | Cell Signaling Technology | RRID: AB_330288                                                                                                     |
| GAPDH Antibody                                       | Proteintech               | RRID:AB_2107436                                                                                                     |
| PGC1 $\alpha$ Antibody                               | Millipore                 | RRID:AB_2043459                                                                                                     |
| Phospho-BCKDHA Antibody                              | Thermo Fisher Scientific  | RRID:AB_2620867                                                                                                     |
| BCKDHA Antibody                                      | Abcam                     | Cat# ab138460                                                                                                       |
| Tom20 (FL-145) Antibody                              | Santa Cruz Biotechnology  | RRID: AB_2207533                                                                                                    |
| Goat anti-rabbit IgG-HRP                             | Santa Cruz Biotechnology  | RRID: AB_631747                                                                                                     |
| Goat anti-mouse IgG-HRP                              | Santa Cruz Biotechnology  | RRID: AB_650499                                                                                                     |
| <b>Chemicals, Peptides, and Recombinant Proteins</b> |                           |                                                                                                                     |
| SYBR Green PCR Master Mix                            | Life Technologies         | Cat# 4312704                                                                                                        |
| Critical Commercial Assays                           |                           |                                                                                                                     |
| Branched Chain Amino Acid Kit                        | Sigma-Aldrich             | MAK003                                                                                                              |
| Glycogen Assay kit II                                | Abcam                     | Ab169558                                                                                                            |
| Lipofectamine LTX with Plus Reagent                  | Thermo Fisher Scientific  | 15338100                                                                                                            |
| <b>Experimental Models: Cell Lines</b>               |                           |                                                                                                                     |
| Mouse: C2C12                                         | ATCC                      | ATCC CRL-1772                                                                                                       |
| Human: HEK 293T                                      | ATCC                      | ATCC CRL-11268                                                                                                      |
| <b>Experimental Models: Organisms/Strains</b>        |                           |                                                                                                                     |
| Mouse: C57BL/6J                                      | Jackson Laboratory        | RRID:IMSR_JAX:000664                                                                                                |
| Mouse: B6.129S1-Irf4 <sup>tm1Rdf</sup> /J            | Jackson Laboratory        | RRID:IMSR_JAX:009380                                                                                                |
| Mouse: Myl1 <sup>tm1(cre)Sjb</sup> /J                | Jackson Laboratory        | RRID:IMSR_JAX:024713                                                                                                |
| Mouse: Rosa26-LSL-IRF4                               | PMID:24995979             | N/A                                                                                                                 |
| Mouse: B6.BKS(D)-Lepr <sup>db</sup> /J               | Jackson Laboratory        | RRID:IMSR_JAX:000697                                                                                                |
| <b>Oligonucleotides</b>                              |                           |                                                                                                                     |
| A full list of Primers is in Table S3                | This paper                | N/A                                                                                                                 |
| <b>Software and Algorithms</b>                       |                           |                                                                                                                     |
| GraphPad Prism 7                                     | GraphPad Software         | <a href="https://www.graphpad.com/scientificsoftware/prism/">https://www.graphpad.com/scientificsoftware/prism/</a> |
| ImageJ Java 1.6.0_2.4                                | NIH                       | <a href="https://imagej.nih.gov/ij/">https://imagej.nih.gov/ij/</a>                                                 |

---

CalRVersion 1.2  
AdipoCount

PMID: 30017358  
CSBio

<https://calrapp.org/>  
<http://www.csbio.sjtu.edu.cn/bioinf/AdipoCount/>

---
