# Supplementary material
Source: publisher figshare collection journal article supplement (https://diabetesjournals.figshare.com/articles/dataset/_/20054417)
Supplement: Supplementary file 2 [file 1]

Supplemental Table 2. Targeted metabolomics analysis on the serum from MKO and Flox mice

| Metabolites (ng/mL)            | flox_s12<br>24 | flox_s12<br>81 | flox_s12<br>82 | flox_s12<br>85 | k0_s12<br>21 | k0_s12<br>23 | k0_s12<br>25 | k0_s12<br>83 |
|--------------------------------|----------------|----------------|----------------|----------------|--------------|--------------|--------------|--------------|
| L_Histidine                    | 22129          | 18337          | 19833          | 19520          | 23411        | 21778        | 36063        | 17812        |
| Dimethylglycine                | 1601           | 1752           | 1970           | 1488           | 1438         | 1589         | 1702         | 1200         |
| Gamma_Aminobutyric acid        | 287            | 244            | 332            | 270            | 302          | 189          | 242          | 167          |
| L_Serine                       | 18495          | 18978          | 22294          | 18105          | 19153        | 18116        | 32284        | 11564        |
| L_threonine                    | 14191          | 14535          | 12371          | 11429          | 16886        | 14860        | 24241        | 11340        |
| L_Homoserine                   | 332            | 1071           | 132            | 45             | 45           | 1068         | 45           | 777          |
| Creatine                       | 77454          | 68304          | 91520          | 51660          | 69829        | 54181        | 114075       | 84053        |
| N_Acetylserotonin              | 57             | 30             | 106            | 96             | 88           | 79           | 59           | 75           |
| Hydroxypropionic acid          | 947            | 869            | 973            | 892            | 1111         | 1522         | 1245         | 1583         |
| Aminocaproic acid              | 166            | 17             | 185            | 101            | 172          | 99           | 237          | 200          |
| Glycylproline                  | 897            | 1071           | 1463           | 830            | 1093         | 751          | 5898         | 810          |
| Adenosine monophosphate        | 567            | 559            | 568            | 542            | 536          | 654          | 869          | 10220        |
| 3_Methylindole                 | 3443           | 5168           | 7355           | 9652           | 6997         | 10843        | 8174         | 5855         |
| L_Lactic acid                  | 794713         | 866848         | 837058         | 605858         | 578697       | 618427       | 779233       | 719780       |
| Methylcysteine                 | 286            | 383            | 395            | 534            | 233          | 258          | 266          | 333          |
| L_Tyrosine                     | 46288          | 43481          | 38334          | 39090          | 47035        | 51083        | 80709        | 34996        |
| 5_Hydroxy_L_tryptophan         | 761            | 675            | 525            | 921            | 417          | 356          | 896          | 2269         |
| L_Aspargine                    | 79012          | 86550          | 79712          | 69071          | 96059        | 82421        | 170214       | 64833        |
| L_Phenylalanine                | 27612          | 23007          | 26151          | 23423          | 26628        | 24350        | 47275        | 30760        |
| Hydroxyphenyllactic acid       | 309            | 465            | 395            | 337            | 512          | 338          | 695          | 420          |
| L_Kynurenine                   | 597            | 625            | 1151           | 562            | 60           | 813          | 917          | 924          |
| L_Aspartic acid                | 4908           | 3430           | 8743           | 2141           | 2655         | 1750         | 19626        | 887          |
| 5_L_Glutamyl_L_alanine         | 741            | 783            | 980            | 713            | 654          | 1128         | 1342         | 531          |
| But_2_enoic acid               | 99             | 0              | 88             | 48             | 80           | 100          | 0            | 0            |
| Pyrrole_2_carboxylic acid      | 61             | 66             | 55             | 67             | 61           | 54           | 60           | 85           |
| 2_Hydroxy_3_methylbutyric acid | 3492           | 3901           | 3993           | 4582           | 3781         | 4621         | 3478         | 4642         |
| Picolinic acid                 | 190            | 177            | 187            | 196            | 187          | 190          | 190          | 203          |
| 4_Hydroxybenzoic acid          | 25             | 0              | 40             | 8              | 0            | 41           | 16           | 19           |
| Ortho_Hydroxyphenylacetic acid | 61             | 67             | 80             | 64             | 70           | 78           | 54           | 61           |
| Hippuric acid                  | 173            | 162            | 546            | 130            | 185          | 799          | 477          | 182          |
| L_Malic acid                   | 13434          | 20625          | 14012          | 7706           | 17081        | 14184        | 28014        | 29140        |
| N_Acetyl_L_aspartic acid       | 895            | 719            | 1863           | 1281           | 505          | 749          | 1236         | 758          |
| Ethylmethylacetic acid         | 471            | 511            | 571            | 566            | 527          | 564          | 537          | 646          |
| 2_Methyl_4_pentenoic acid      | 19             | 24             | 17             | 17             | 20           | 28           | 35           | 19           |
| Benzoic acid                   | 576            | 545            | 569            | 515            | 513          | 485          | 542          | 558          |
| 2_Hydroxycaproic acid          | 127            | 124            | 90             | 112            | 138          | 123          | 124          | 139          |
| Phenylacetic acid              | 201            | 172            | 186            | 199            | 185          | 263          | 271          | 366          |
| Indoleacetic acid              | 68             | 61             | 61             | 51             | 64           | 88           | 78           | 74           |
| Glutaric acid                  | 321            | 313            | 298            | 244            | 323          | 326          | 536          | 538          |
| trans_Aconitic acid            | 159968         | 138459         | 216595         | 134553         | 131648       | 180274       | 157302       | 182705       |

|                              |        |        |        |        |        |        |        |        |
|------------------------------|--------|--------|--------|--------|--------|--------|--------|--------|
| 2_Phenylpropionate           | 28     | 25     | 25     | 24     | 28     | 41     | 64     | 25     |
| Hydrocinnamic acid           | 17     | 6      | 7      | 2      | 19     | 50     | 117    | 4      |
| Benzenebutanoic acid         | 789    | 709    | 748    | 777    | 773    | 768    | 751    | 809    |
| Indoleacrylic acid           | 8      | 4      | 10     | 19     | 11     | 14     | 7      | 6      |
| 3_Indolepropionic acid       | 230    | 386    | 347    | 351    | 676    | 491    | 506    | 221    |
| 4_Hydroxyphenylpyruvic acid  | 6555   | 4755   | 3639   | 2103   | 4708   | 7264   | 8038   | 5258   |
| Azelaic acid                 | 1269   | 888    | 2567   | 992    | 428    | 1352   | 1424   | 1494   |
| Sebacic acid                 | 1433   | 1272   | 1983   | 1412   | 1240   | 1447   | 1490   | 1672   |
| Benzamide                    | 2622   | 2819   | 2670   | 3113   | 2487   | 2972   | 2747   | 2889   |
| Phenylpyruvic acid           | 1733   | 1496   | 1365   | 1535   | 1632   | 2444   | 2257   | 1106   |
| Methylmalonic acid           | 8904   | 11862  | 6245   | 4107   | 6609   | 4896   | 19654  | 20594  |
| D_2_Hydroxyglutaric acid     | 2235   | 2256   | 2664   | 1757   | 1687   | 2062   | 2542   | 3469   |
| Galactonic acid              | 41     | 41     | 41     | 251    | 166    | 244    | 394    | 376    |
| D_Gluconolactone             | 466    | 527    | 921    | 546    | 525    | 492    | 433    | 756    |
| Glycolic acid                | 5783   | 5484   | 5772   | 5721   | 6388   | 5750   | 5127   | 7279   |
| L_Alpha_aminobutyric acid    | 246    | 249    | 303    | 319    | 271    | 264    | 256    | 306    |
| Glyceric acid                | 2059   | 1541   | 1576   | 1377   | 1301   | 1351   | 1848   | 1495   |
| Acetylglycine                | 2135   | 1750   | 2434   | 1670   | 1960   | 2381   | 2106   | 3102   |
| L_Pipecolic acid             | 1132   | 880    | 1272   | 1121   | 1308   | 1642   | 1094   | 1482   |
| Erythronic acid              | 3314   | 2299   | 7601   | 1493   | 1963   | 1791   | 2618   | 3173   |
| N_Acetylserine               | 241    | 249    | 327    | 229    | 209    | 215    | 198    | 273    |
| Ribonolactone                | 69     | 48     | 48     | 48     | 52     | 48     | 48     | 53     |
| Ribonic acid                 | 97     | 103    | 152    | 122    | 109    | 90     | 91     | 92     |
| N_Acetylglutamine            | 436    | 470    | 1063   | 304    | 518    | 405    | 389    | 313    |
| L_Acetylcarnitine            | 22980  | 15997  | 19894  | 18658  | 16813  | 15424  | 19417  | 27934  |
| N_Acetylneuraminic acid      | 6056   | 4566   | 9272   | 5663   | 4817   | 5294   | 6874   | 6170   |
| Melibiose                    | 357    | 758    | 736    | 685    | 520    | 666    | 976    | 1080   |
| C1 0                         | 40662  | 36176  | 45079  | 37749  | 40459  | 42902  | 40164  | 40245  |
| p_Cresol sulfate             | 3046   | 5476   | 4679   | 1660   | 2487   | 5303   | 1496   | 3459   |
| C2 0                         | 1646   | 1258   | 4760   | 2516   | 1841   | 3889   | 2177   | 2200   |
| L_Valine                     | 44299  | 42105  | 32591  | 36827  | 56931  | 52540  | 63868  | 48850  |
| Pyroglutamic acid            | 12296  | 10721  | 17202  | 8187   | 8665   | 7315   | 27021  | 13418  |
| 5_Aminolevulinic acid        | 211    | 202    | 285    | 151    | 209    | 154    | 495    | 189    |
| D_Glucose                    | 144611 | 208856 | 185887 | 215206 | 133638 | 141231 | 132163 | 184125 |
|                              | 9      | 8      | 4      | 5      | 9      | 6      | 9      | 9      |
| 3,4_Dihydroxymandelic acid   | 72     | 13     | 39     | 92     | 39     | 13     | 61     | 70     |
| Lactulose                    | 94     | 156    | 143    | 215    | 388    | 225    | 242    | 65     |
| D_Maltose and Alpha_Lactose  | 733    | 1127   | 1005   | 755    | 1331   | 692    | 720    | 892    |
| 3_Hydroxybutyric acid        | 50053  | 50012  | 53775  | 67801  | 53527  | 38906  | 47665  | 157324 |
| alpha_Hydroxyisobutyric acid | 3491   | 3042   | 3677   | 2827   | 3387   | 3969   | 2243   | 2698   |
| 2_Hydroxybutyric acid        | 4295   | 4539   | 4334   | 5019   | 4017   | 4152   | 5612   | 10900  |
| 3_Hydroxyisovaleric acid     | 648    | 600    | 581    | 650    | 636    | 630    | 652    | 655    |
| Glutaconic acid              | 12828  | 10377  | 15384  | 11241  | 12965  | 12981  | 12205  | 14762  |
| L_Isoleucine and L_Leucine   | 66161  | 65692  | 71387  | 54097  | 84530  | 74538  | 158163 | 72738  |
| D_Xylose                     | 2721   | 2115   | 1580   | 2854   | 1761   | 1171   | 1241   | 1671   |

|                                               |        |        |        |        |        |        |        |        |
|-----------------------------------------------|--------|--------|--------|--------|--------|--------|--------|--------|
| D_Ribulose                                    | 370    | 276    | 367    | 401    | 222    | 341    | 287    | 439    |
| Beta_D_Fucose                                 | 672    | 1280   | 1645   | 1021   | 1802   | 979    | 593    | 1476   |
| p_Hydroxymandelic acid                        | 100    | 72     | 129    | 78     | 92     | 98     | 80     | 81     |
| D_Fructose                                    | 3228   | 6945   | 2543   | 2748   | 19521  | 19554  | 11331  | 22660  |
| C3 0                                          | 761    | 582    | 729    | 731    | 572    | 641    | 764    | 704    |
| Glyceraldehyde                                | 317    | 143    | 358    | 72     | 161    | 195    | 325    | 319    |
| L_Norleucine                                  | 119    | 68     | 77     | 171    | 243    | 9      | 9      | 254    |
| 3_3_Hydroxyphenyl<br>_3_hydroxypropanoic acid | 249    | 244    | 207    | 154    | 294    | 214    | 376    | 303    |
| 2_Furoic acid                                 | 27     | 17     | 33     | 13     | 15     | 12     | 41     | 28     |
| 3_Hydroxyanthranilic acid                     | 404    | 338    | 28     | 511    | 416    | 328    | 356    | 396    |
| L_Tryptophan                                  | 43824  | 35477  | 39417  | 43818  | 35210  | 42248  | 54060  | 40583  |
| C4 0                                          | 301    | 263    | 276    | 286    | 263    | 292    | 320    | 307    |
| Isobutyric acid                               | 598    | 419    | 412    | 517    | 486    | 395    | 412    | 488    |
| Mandelic acid                                 | 41     | 29     | 37     | 38     | 45     | 66     | 32     | 35     |
| Malonic acid                                  | 146    | 141    | 189    | 110    | 133    | 120    | 172    | 195    |
| Alpha_N_Phenylacetyl_L_gluta<br>mine          | 76     | 81     | 79     | 81     | 77     | 220    | 91     | 79     |
| Tartaric acid                                 | 1300   | 2072   | 3852   | 388    | 2858   | 7845   | 3381   | 3284   |
| Phenyllactic acid                             | 42     | 28     | 47     | 30     | 60     | 75     | 90     | 43     |
| Selenomethionine                              | 13614  | 11769  | 12713  | 14569  | 17320  | 16228  | 11529  | 12322  |
| Oxalic acid                                   | 1106   | 1022   | 1384   | 1121   | 1114   | 1300   | 898    | 1467   |
| Maleic acid                                   | 2829   | 3889   | 2638   | 1685   | 2862   | 2549   | 5031   | 5870   |
| Methylsuccinic acid                           | 225    | 220    | 216    | 188    | 221    | 236    | 356    | 335    |
| Adipic acid                                   | 723    | 709    | 641    | 518    | 564    | 737    | 808    | 900    |
| Methylglutaric acid                           | 41     | 52     | 56     | 44     | 50     | 67     | 53     | 52     |
| Phthalic acid                                 | 17     | 14     | 20     | 17     | 14     | 18     | 16     | 25     |
| cis_Aconitic acid                             | 137844 | 111890 | 189875 | 113357 | 105741 | 149092 | 141660 | 159068 |
| TwMCA                                         | 9      | 330    | 318    | 1241   | 161    | 671    | 493    | 1319   |
| Pimelic acid                                  | 184    | 48     | 407    | 48     | 60     | 142    | 159    | 183    |
| C6 0                                          | 1149   | 520    | 715    | 546    | 468    | 512    | 831    | 789    |
| Fructose 1,6_bisphosphate                     | 11364  | 10145  | 9892   | 9819   | 11944  | 9072   | 9392   | 10959  |
| Phosphoribosyl pyrophosphate                  | 8144   | 9151   | 6008   | 6461   | 10222  | 7729   | 6125   | 7065   |
| Isocitric acid                                | 475    | 433    | 837    | 535    | 371    | 646    | 551    | 622    |
| 2_Methylhexanoic acid                         | 17     | 17     | 20     | 21     | 15     | 20     | 18     | 15     |
| C7 0                                          | 136    | 76     | 147    | 91     | 65     | 96     | 98     | 101    |
| Pyruvate                                      | 479762 | 313070 | 359320 | 297065 | 228142 | 368716 | 283991 | 190067 |
| 12_DHCA                                       | 442    | 753    | 385    | 464    | 389    | 669    | 413    | 797    |
| wMCA                                          | 714    | 779    | 694    | 753    | 693    | 779    | 778    | 946    |
| Oxoglutaric acid                              | 32324  | 51739  | 34385  | 37992  | 45264  | 49833  | 64029  | 79830  |
| C8 0                                          | 2585   | 2470   | 1672   | 1803   | 3001   | 1970   | 2031   | 3491   |
| CA                                            | 158    | 194    | 127    | 181    | 164    | 260    | 194    | 392    |
| GCA                                           | 116    | 118    | 210    | 444    | 78     | 357    | 297    | 226    |
| C9 0                                          | 774    | 609    | 765    | 656    | 587    | 627    | 627    | 733    |
| C10 0                                         | 5551   | 5265   | 2372   | 4009   | 7155   | 3054   | 3409   | 8271   |
| C11 1 cis_10                                  | 1475   | 1594   | 1570   | 1679   | 1559   | 1534   | 1555   | 1608   |

|                            |        |        |        |        |        |        |        |        |
|----------------------------|--------|--------|--------|--------|--------|--------|--------|--------|
| Trehalose                  | 14694  | 14828  | 14589  | 15164  | 15521  | 14685  | 16614  | 16061  |
| CDCA                       | 646    | 575    | 445    | 593    | 670    | 596    | 578    | 1281   |
| C11 0                      | 1706   | 1790   | 1727   | 1756   | 1687   | 1712   | 1681   | 1856   |
| C12 1 cis_11               | 3733   | 2570   | 3269   | 4165   | 2955   | 2150   | 2240   | 3621   |
| C12 0                      | 164863 | 128009 | 61451  | 138643 | 206384 | 53223  | 68993  | 234814 |
| C13 1 cis_12               | 2298   | 2252   | 2373   | 2417   | 2344   | 2340   | 2253   | 2374   |
| C14 1 cis_9                | 15202  | 9598   | 12442  | 17311  | 12991  | 6947   | 7118   | 12178  |
| C14 1 trans_9              | 41543  | 39834  | 41520  | 45413  | 41654  | 42038  | 41268  | 45429  |
| C18 1 cis_9 12_OH          | 813    | 577    | 1403   | 668    | 450    | 671    | 824    | 990    |
| C18 1 trans_9 12_OH        | 881    | 458    | 1567   | 443    | 350    | 718    | 894    | 1088   |
| LCA                        | 192    | 259    | 221    | 279    | 148    | 253    | 239    | 237    |
| DCA                        | 1125   | 1092   | 1050   | 1176   | 985    | 910    | 1010   | 1019   |
| C14 0                      | 81861  | 73482  | 65708  | 77966  | 82862  | 54812  | 60798  | 86516  |
| C15 1                      | 2431   | 2488   | 2546   | 2606   | 2464   | 2475   | 2481   | 2804   |
| C15 0                      | 6770   | 6558   | 6579   | 7301   | 6189   | 6460   | 6005   | 7973   |
| C17 1 cis_10               | 4524   | 3985   | 4582   | 4921   | 3596   | 3405   | 3339   | 5323   |
| C18 2 trans_9 12           | 5382   | 5619   | 5941   | 6700   | 5493   | 5059   | 4807   | 6203   |
| C20 5 cis_5 8 11 14 17     | 2343   | 2268   | 2248   | 2363   | 1912   | 1587   | 1876   | 2615   |
| C22 5 cis_7 10 13 16 19    | 9825   | 8988   | 9731   | 11540  | 8592   | 6737   | 6738   | 11691  |
| Succinic acid              | 7985   | 10310  | 5651   | 3736   | 6031   | 4399   | 17105  | 17813  |
| Citramalic acid            | 151    | 138    | 457    | 161    | 136    | 451    | 240    | 113    |
| C16 0                      | 345846 | 323464 | 337616 | 418633 | 343082 | 241927 | 280221 | 408764 |
| C17 0                      | 12688  | 12486  | 11794  | 11627  | 10843  | 11134  | 10293  | 16516  |
| C18 1 cis_9                | 181180 | 286985 | 296064 | 163944 | 245662 | 220588 | 222452 | 304445 |
| C19 0                      | 7460   | 11346  | 6267   | 9988   | 11126  | 3593   | 5320   | 13315  |
| C22 2 cis_13 16            | 2658   | 3150   | 4080   | 3002   | 2040   | 2036   | 3323   | 4497   |
| L_Lysine                   | 26767  | 24922  | 38553  | 25270  | 34479  | 27356  | 115213 | 28861  |
| L_Alanine                  | 802    | 835    | 921    | 697    | 706    | 976    | 956    | 974    |
| Glycyl_L_leucine           | 16     | 4      | 15     | 12     | 23     | 0      | 112    | 0      |
| Alpha_ketoisovaleric acid  | 2291   | 2193   | 2007   | 2303   | 2565   | 1737   | 2901   | 2183   |
| Ketoleucine                | 5918   | 5994   | 5212   | 5298   | 5430   | 4613   | 7512   | 5345   |
| 3_Methyl_2_oxovaleric acid | 3886   | 3739   | 3392   | 3844   | 3972   | 3530   | 4502   | 3891   |
| Glycine                    | 3877   | 3374   | 5085   | 3571   | 3242   | 3547   | 4361   | 2138   |
| Guanidoacetic acid         | 90     | 125    | 366    | 172    | 107    | 152    | 132    | 144    |
| N_Acetylmornithine         | 60565  | 55943  | 59865  | 34235  | 33705  | 58340  | 55537  | 60814  |
| Citrulline                 | 11996  | 12948  | 13015  | 11611  | 10788  | 11234  | 14253  | 7988   |
| L_Proline                  | 65087  | 70248  | 52660  | 41647  | 94691  | 71895  | 103335 | 45692  |
| L_Methionine               | 21904  | 19334  | 16257  | 18674  | 23567  | 24912  | 41736  | 11362  |
| L_Alloisoleucine           | 15141  | 15338  | 12024  | 13158  | 20337  | 17900  | 23173  | 17850  |
| D_Xylulose                 | 426    | 358    | 510    | 617    | 177    | 389    | 197    | 686    |
| p_Hydroxyphenylacetic acid | 177    | 173    | 21     | 21     | 392    | 252    | 46     | 21     |
| N_Methylnicotinamide       | 176    | 122    | 167    | 176    | 111    | 211    | 232    | 415    |
| Acetoacetic acid           | 18012  | 9352   | 11856  | 19104  | 17793  | 11093  | 6393   | 8474   |
| Suberic acid               | 358    | 385    | 1319   | 643    | 245    | 489    | 1021   | 832    |

|                           |        |        |        |        |        |        |        |        |
|---------------------------|--------|--------|--------|--------|--------|--------|--------|--------|
| TUDCA                     | 257    | 231    | 174    | 419    | 286    | 409    | 251    | 525    |
| THDCA                     | 211    | 295    | 210    | 611    | 147    | 235    | 259    | 316    |
| TCA                       | 1700   | 3686   | 1713   | 11305  | 858    | 3122   | 4395   | 2850   |
| Citric acid               | 28563  | 27366  | 40093  | 21128  | 20631  | 29489  | 28562  | 31568  |
| TDCA                      | 351    | 680    | 360    | 2890   | 277    | 440    | 559    | 385    |
| TCDCa                     | 198    | 182    | 95     | 526    | 126    | 208    | 294    | 296    |
| bMCA                      | 2084   | 2274   | 1900   | 2062   | 2280   | 2559   | 2219   | 3073   |
| Acetaminophen             | 282    | 248    | 749    | 303    | 222    | 333    | 218    | 486    |
| bUDCA                     | 29     | 38     | 33     | 38     | 38     | 38     | 33     | 39     |
| UDCA                      | 404    | 408    | 399    | 414    | 423    | 438    | 413    | 537    |
| Oxoadipic acid            | 1758   | 992    | 1837   | 697    | 1124   | 1175   | 2431   | 1752   |
| GCDCA                     | 34     | 59     | 57     | 47     | 58     | 63     | 29     | 51     |
| C13 0                     | 2243   | 2303   | 2309   | 2469   | 2326   | 2241   | 2319   | 2485   |
| C18 0 12_OH               | 1680   | 1626   | 1811   | 1625   | 1617   | 1641   | 1809   | 1748   |
| C16 1 cis_9               | 82976  | 61707  | 66741  | 90855  | 60076  | 28450  | 35220  | 83029  |
| C16 1 trans_9             | 9161   | 8153   | 8303   | 9099   | 7975   | 6283   | 6571   | 8678   |
| C17 1 trans_10            | 3765   | 4141   | 4659   | 4492   | 4159   | 4320   | 4080   | 5067   |
| C18 3 cis_9 12 15         | 4545   | 4027   | 3242   | 4881   | 4790   | 2511   | 2423   | 6430   |
| C18 3 cis_6 9 12          | 988    | 1009   | 668    | 1118   | 729    | 388    | 524    | 1266   |
| C18 2 cis_9 12            | 68792  | 59929  | 46603  | 72387  | 55406  | 37541  | 40377  | 85093  |
| C19 2 cis_10 13           | 3293   | 3458   | 3782   | 3521   | 3585   | 3821   | 3516   | 4019   |
| C20 4 cis_5 8 11 14       | 36485  | 31051  | 22065  | 39456  | 29068  | 15953  | 27408  | 24891  |
| C20 3 cis_8 11 14         | 3439   | 4057   | 3375   | 3987   | 3037   | 2418   | 2777   | 4314   |
| C22 6 cis_4 7 10 13 16 19 | 33751  | 33391  | 26913  | 41264  | 28947  | 20827  | 24039  | 30768  |
| C22 5 cis_4 7 10 13 16    | 10255  | 8915   | 8319   | 11541  | 8965   | 7837   | 8261   | 9580   |
| C22 4 cis_7 10 13 16      | 16427  | 11768  | 11435  | 17610  | 11370  | 9337   | 9877   | 12274  |
| C18 1 trans_11            | 2982   | 2732   | 4525   | 3579   | 2423   | 3106   | 2957   | 3293   |
| C18 0                     | 418619 | 415486 | 374809 | 508769 | 467173 | 273272 | 371502 | 497461 |
| C19 1 cis_10              | 20037  | 19984  | 22170  | 23549  | 19501  | 19486  | 18718  | 27203  |
| C19 1 cis_7               | 2017   | 2157   | 2302   | 2178   | 2156   | 2242   | 2043   | 2456   |
| C20 2 cis_11 14           | 6040   | 5979   | 4646   | 6830   | 4246   | 3633   | 3507   | 5909   |
| C20 1 cis_11              | 70493  | 93333  | 47331  | 81478  | 42278  | 28693  | 29959  | 74997  |
| C20 1 cis_5               | 500    | 524    | 426    | 658    | 225    | 311    | 307    | 663    |
| C21 2 cis_12 15           | 1121   | 1392   | 1538   | 1471   | 1551   | 1498   | 1353   | 1744   |
| C21 1 cis_12              | 3197   | 1862   | 1498   | 2302   | 1999   | 1437   | 1050   | 3163   |
| C22 3 cis_13 16 19        | 1763   | 1879   | 1818   | 2412   | 1893   | 1816   | 1513   | 2757   |
