# Supplementary material
Source: publisher figshare collection journal article supplement (https://diabetesjournals.figshare.com/articles/dataset/_/20054417)
Supplement: Supplementary file 3 [file 1]

Supplemental Table 1. Characteristics of male subjects with or without obesity

|                            | Total<br>(n=10) | Lean<br>(n=5) | Obese<br>(n=5) | P value |
|----------------------------|-----------------|---------------|----------------|---------|
| Age (year)                 | 31.1±9.7        | 31.0±8.1      | 31.2±12.1      | 0.976   |
| Height(cm)                 | 175.9±5.8       | 175.6±6.6     | 176.2±5.6      | 0.880   |
| Weight(kg)                 | 79.4±13.3       | 68.8±8.0      | 90.0±7.4       | 0.002   |
| BMI(kg/m <sup>2</sup> )    | 25.6±3.8        | 22.3±1.8      | 28.9±1.0       | <0.001  |
| Glucose (mM)               | 5.9±1.2         | 5.3±0.8       | 6.5±1.4        | 0.127   |
| WBC(10 <sup>9</sup> /L)    | 6.9±1.3         | 6.5±1.1       | 7.3±1.5        | 0.349   |
| NEUT#                      | 4.0±1.1         | 3.9±1.0       | 4.2±1.3        | 0.694   |
| NEUT(%)                    | 57.5±6.6        | 59.0±7.3      | 56.0±6.3       | 0.507   |
| LYMPH(%)                   | 31.9±5.6        | 31.3±6.9      | 32.6±4.7       | 0.724   |
| MONO(%)                    | 6.7±1.6         | 6.0±1.3       | 7.3±1.7        | 0.205   |
| EO(%)                      | 3.4±2.1         | 3.3±3.0       | 3.5±0.7        | 0.892   |
| BASO(%)                    | 0.5±0.1         | 0.5±0.1       | 0.6±0.1        | 0.206   |
| RBC(10 <sup>12</sup> /L)   | 5.2±0.4         | 5.1±0.5       | 5.3±0.4        | 0.498   |
| HGB(g/L)                   | 157.9±12.9      | 155.0±13.7    | 160.8±12.9     | 0.515   |
| HCT(%)                     | 46.2±3.4        | 45.8±3.9      | 46.7±3.2       | 0.693   |
| MCV(fl)                    | 82.0±17.0       | 89.0±2.6      | 75.0±22.8      | 0.207   |
| MCH(pg)                    | 30.1±0.5        | 30.1±0.7      | 30.1±0.3       | 0.892   |
| MCHC(g/L)                  | 341.2±6.6       | 338.4±6.7     | 344±5.7        | 0.193   |
| RDW-SD(fl)                 | 39.7±1.3        | 40.4±1.4      | 39±0.9         | 0.101   |
| RDW-CV(%)                  | 12.3±0.4        | 12.4±0.4      | 12.3±0.4       | 0.574   |
| PLT(10 <sup>9</sup> /L)    | 267.1±68.0      | 217.0±42.1    | 317.2±48.3     | 0.008   |
| MPV(fl)                    | 10.4±1.4        | 11.2±1.7      | 9.6±0.4        | 0.099   |
| PDW(fl)                    | 12.0±2.3        | 13.3±2.6      | 10.8±1.0       | 0.082   |
| P-LCR(%)                   | 27.8±10.2       | 33.4±11.7     | 22.1±3.7       | 0.098   |
| LYMPH#(10 <sup>9</sup> /L) | 2.2±0.3         | 2.0±0.4       | 2.3±0.2        | 0.142   |
| MONO#(10 <sup>9</sup> /L)  | 0.5±0.1         | 0.4±0.1       | 0.5±0.1        | 0.140   |
| BASO#(10 <sup>9</sup> /L)  | 0.04±0.01       | 0.03±0.01     | 0.04±0.00      | 0.033   |
| EO#(10 <sup>9</sup> /L)    | 0.2±0.1         | 0.2±0.1       | 0.3±0.1        | 0.387   |

Data are mean ±standard deviation (SD). Statistical analysis was performed using Student's T-test or non-parametric test; n=5 biological replicates. BMI, body mass index; WBC, white blood cell; NEUT, neutrophils; LYMPH, lymphocyte; MONO, monocyte; EO, eosinophils; BASO, basophil; RBC, red blood cell; HGB, hemoglobin; HCT, hematocrit; MCV, mean corpuscular volume; MCH, mean cell hemoglobin; MCHC, mean cell hemoglobin concentration; RDW, red blood cell distribution width; PLT, platelet; MPV, mean platelet volume; PDW, platelet volume distribution width; P-LCR, platelet-larger cell ratio.
