# Supplementary material
Source: publisher figshare collection journal article supplement (https://diabetesjournals.figshare.com/articles/dataset/_/20054417)
Supplement: Supplementary file 4 [file 1]

Supplemental Table 3. Sequence of primers

| Gene          | Species | Forward primer         | Reverse primer           |
|---------------|---------|------------------------|--------------------------|
| Irf4          | Mouse   | CAGGACTACAATCGTGAGGAGG | GCACATCGTAATCTTGTCTTCCA  |
| Tbp           | Mouse   | CCCCTTGTAACCCTTCACCAAT | GAAGCTGCGGTACAATTCCAG    |
| COXII         | Mouse   | CAGGCCGACTAAATCAAGCAAC | CTAGGACAAT GGGCATAAAG CT |
| Actin         | Mouse   | CCAGCCTTCCTTCTTGGGTAT  | TGCTGGAAGGTGGACAGTGAG    |
| Pgc1 $\alpha$ | Mouse   | GGACATGTGCAGCCAAGACTCT | CACTTCAATCCACCCAGAAAGCT  |
| Bcatm         | Mouse   | CAGCCACACTAGGACAGGTCT  | CAGCCTTGTTATTCCACTCCAC   |
| Bckdk         | Mouse   | ACATCAGCCACCGATACACAC  | GAGGCGAACTGAGGGCTTC      |
| Bckdha        | Mouse   | GACCTGGTGTTTGGCCAGTA   | GCCGTAGTGAACAGGCATCT     |
| Acads         | Mouse   | TTGCCGAGAAGGAGTTGGTC   | AGGTAATCCAAGCCTGCACC     |
| Acadsb        | Mouse   | GGACTGGCCCAAGGATGTTT   | CGAGCCTAGCAGCGTTGTAT     |
| AdipQ         | Mouse   | TGTTCTCTTAATCCTGCCCA   | CCAACCTGCACAAGTTCCTT     |
| $\beta$ 3AR   | Mouse   | ATTGGCGCTGACTGGCCATT   | CCTCGGCATCTGCCCCTACA     |
| Cidea         | Mouse   | ATCACAACTGGCCTGGTTACG  | TACTACCCGGTGTCCATTTCT    |
| Leptin        | Mouse   | CTGGAGAATCTCCGAGACCT   | TCAGGGCTAACATCCAAGT      |
| Ucp1          | Mouse   | AGGCTTCCAGTACCATTAGGT  | CTGAGTGAGGCAAAGCTGATT    |
